## Correction: Reduced E-cadherin expression is correlated with poor prognosis in patients with bladder cancer: a systematic review and meta-analysis

**Yongpeng Xie<sup>1,2,\*</sup>, Pin Li<sup>2,1,\*</sup>, Yu Gao<sup>1,\*</sup>, Liangyou Gu<sup>1</sup>, Luyao Chen<sup>3</sup>, Yang Fan<sup>1</sup>, Fan Zhang<sup>1</sup> and Xu Zhang<sup>1,2</sup>**

<sup>1</sup> Department of Urology, State Key Laboratory of Kidney Diseases, Chinese PLA General Hospital, Beijing, People's Republic of China

<sup>2</sup> School of Medicine, Nankai University, Tianjin, People's Republic of China

<sup>3</sup> Department of Urology, First Affiliated Hospital of Nanchang University, Nanchang, People's Republic of China

\* Authors contributed equally to this work

**Published:** April 05, 2019

**Copyright:** Xie et al. This is an open-access article distributed under the terms of the Creative Commons Attribution License 3.0 (CC BY 3.0), which permits unrestricted use, distribution, and reproduction in any medium, provided the original author and source are credited.

**This article has been corrected:** The correct author information is given below:

**Pin Li<sup>2,1,\*</sup> and Xu Zhang<sup>1,2</sup>**

Original article: Oncotarget. 2017; 8:62489-62499. <https://doi.org/10.18632/oncotarget.19934>
